# Supplementary material
Source: PubMed Central journal article supplement (PMC3196888)

# Supplementary Figure 1

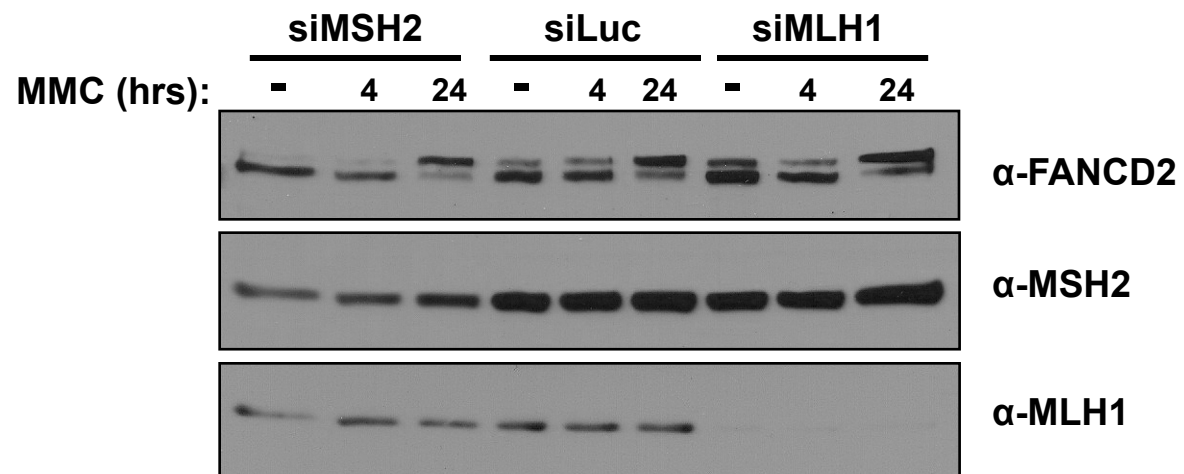

## Supplementary Figure 2

**A**

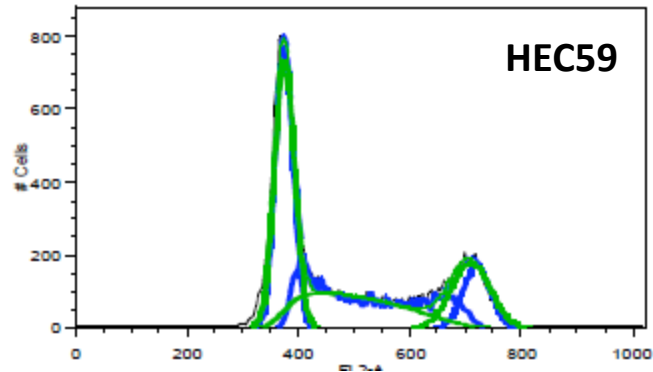

**%G1: 44.9 %S: 32.5 %G2: 21.9**

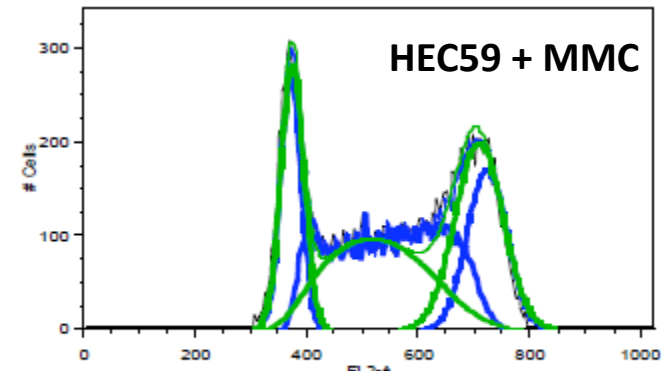

**%G1: 24.9 %S: 39.6 %G2: 36.5**

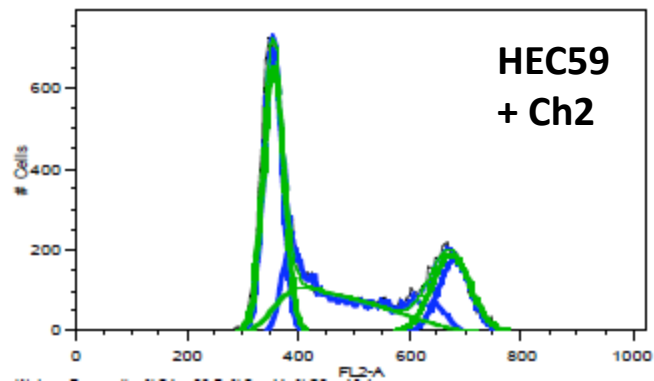

**%G1: 42.9 %S: 33.7 %G2: 23.5**

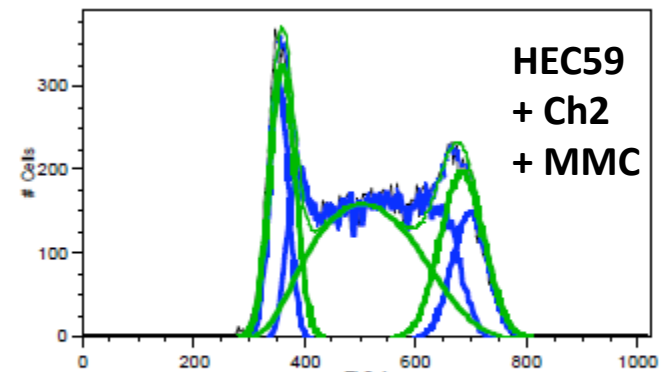

**%G1: 23.9 %S: 50.6 %G2: 25.5**

## Supplementary Figure 2

**B**

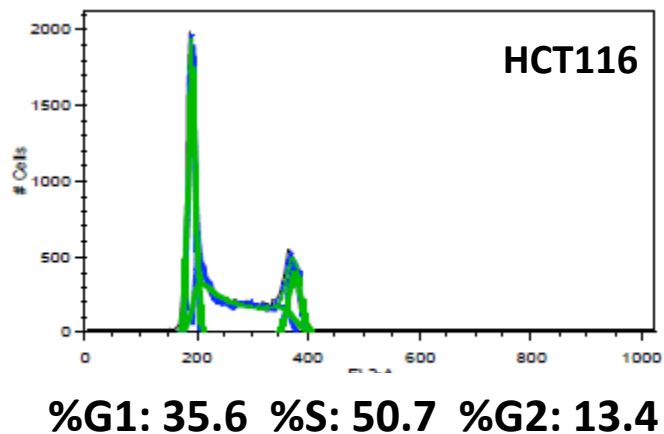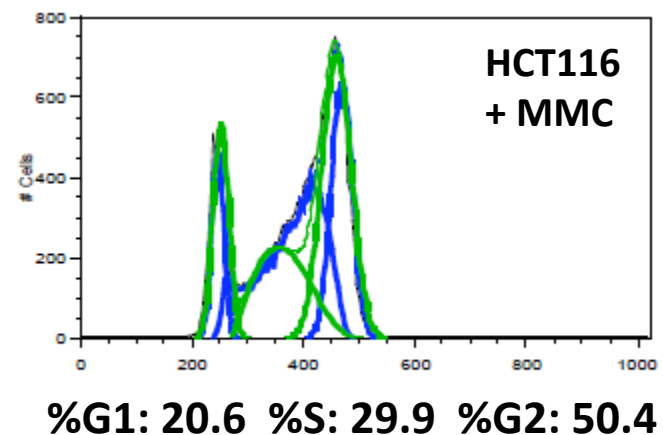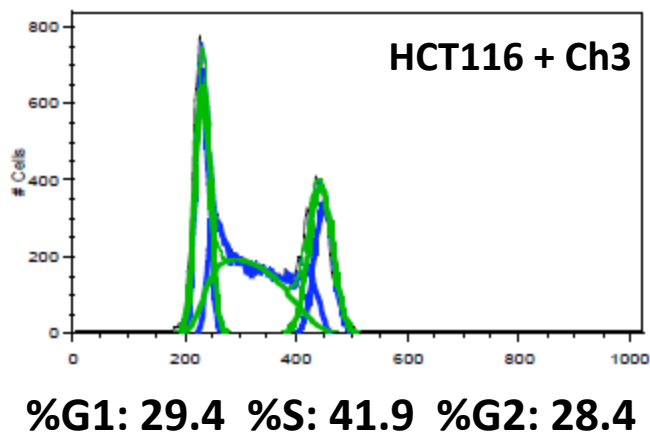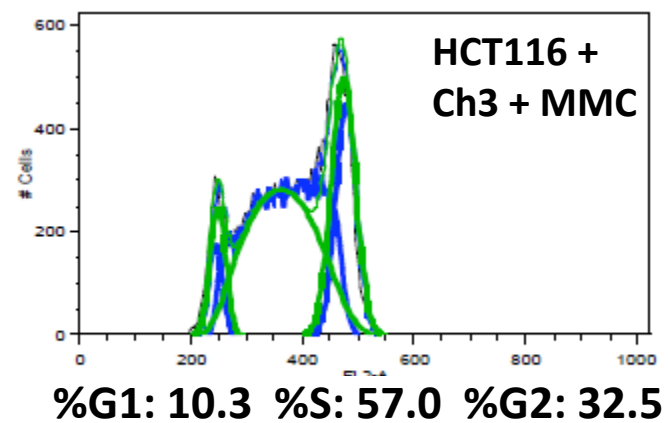

Supplementary Figure 3

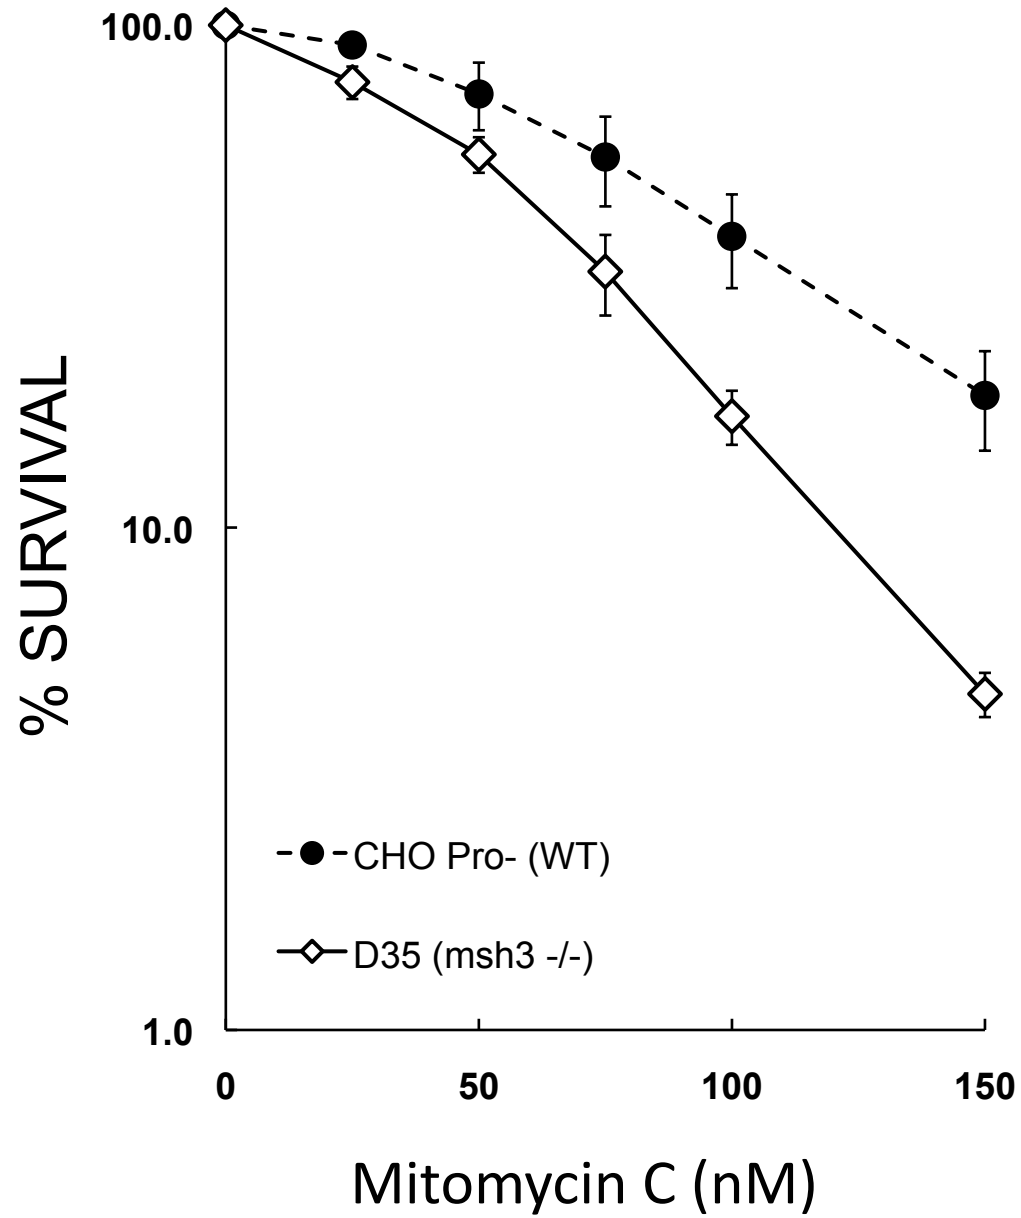

Supplement: supp_ddr366_ddr366supp_figs.pdf [file supp_ddr366_ddr366supp_figs.pdf]
